# Supplementary material
Source: PubMed Central journal article supplement (PMC3372274)
Supplement: supp_32.12.2289_MCB-MCB06529-11-s01.pdf [file supp_32.12.2289_MCB-MCB06529-11-s01.pdf]

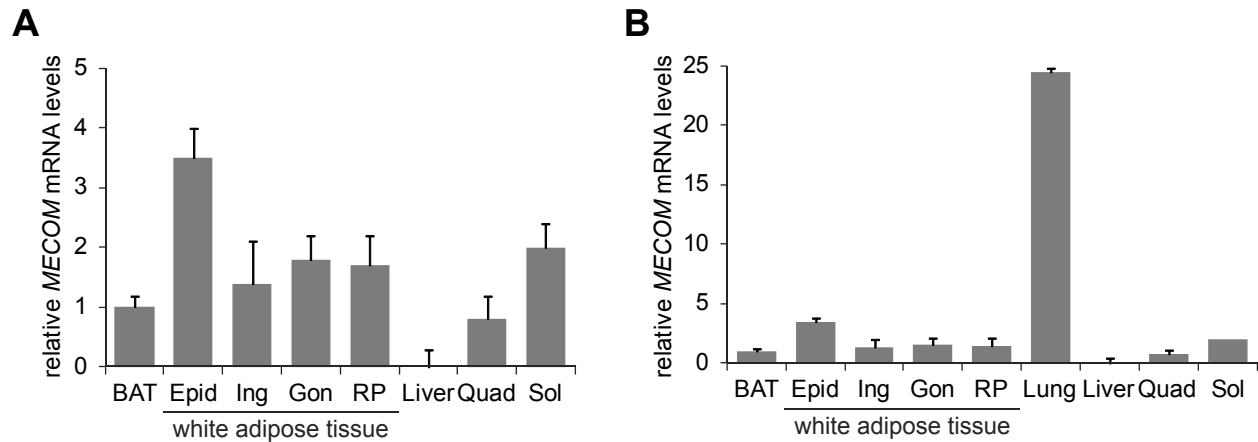

**FIG. S1:** *MECOM* is expressed in mouse fat depots. Real-time RT-PCR analysis of total RNA from a panel of mouse tissues. *MECOM* transcripts were found at moderate levels in all fat pads examined and in skeletal muscle; adult lung tissue has high expression and liver tissue has negligible expression. (A) and (B) are the same except for the expanded y-axis and addition of lung tissue in (B). BAT, brown adipose tissue; Epid, epididymal fat pad; Ing, inguinal fat pad; RP, retroperitoneal fat pad; Quad, quadriceps muscle; Sol, soleus muscle.

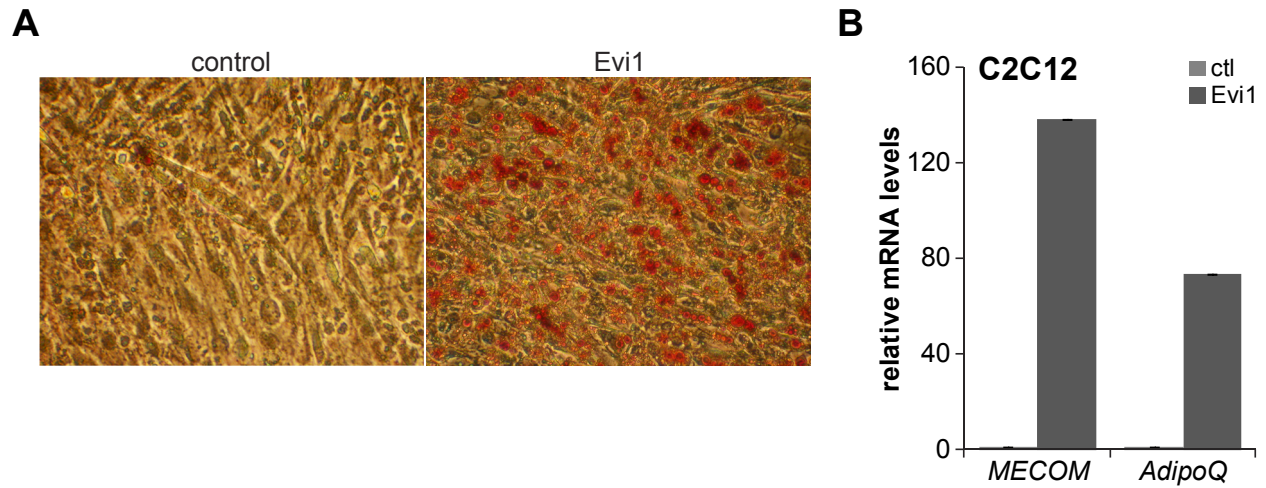

**FIG. S2:** Ectopic expression of Evi1 converts C2C12 myoblasts into adipocytes. C2C12 myoblasts were infected with retrovirus, vector (control) or Evi1, before being switched to adipocyte induction medium. (A) Oil Red O staining for lipid droplets. (B) Real-time PCR analysis showing overexpression of *Evi1* and activation of adipose marker *AdipoQ*.

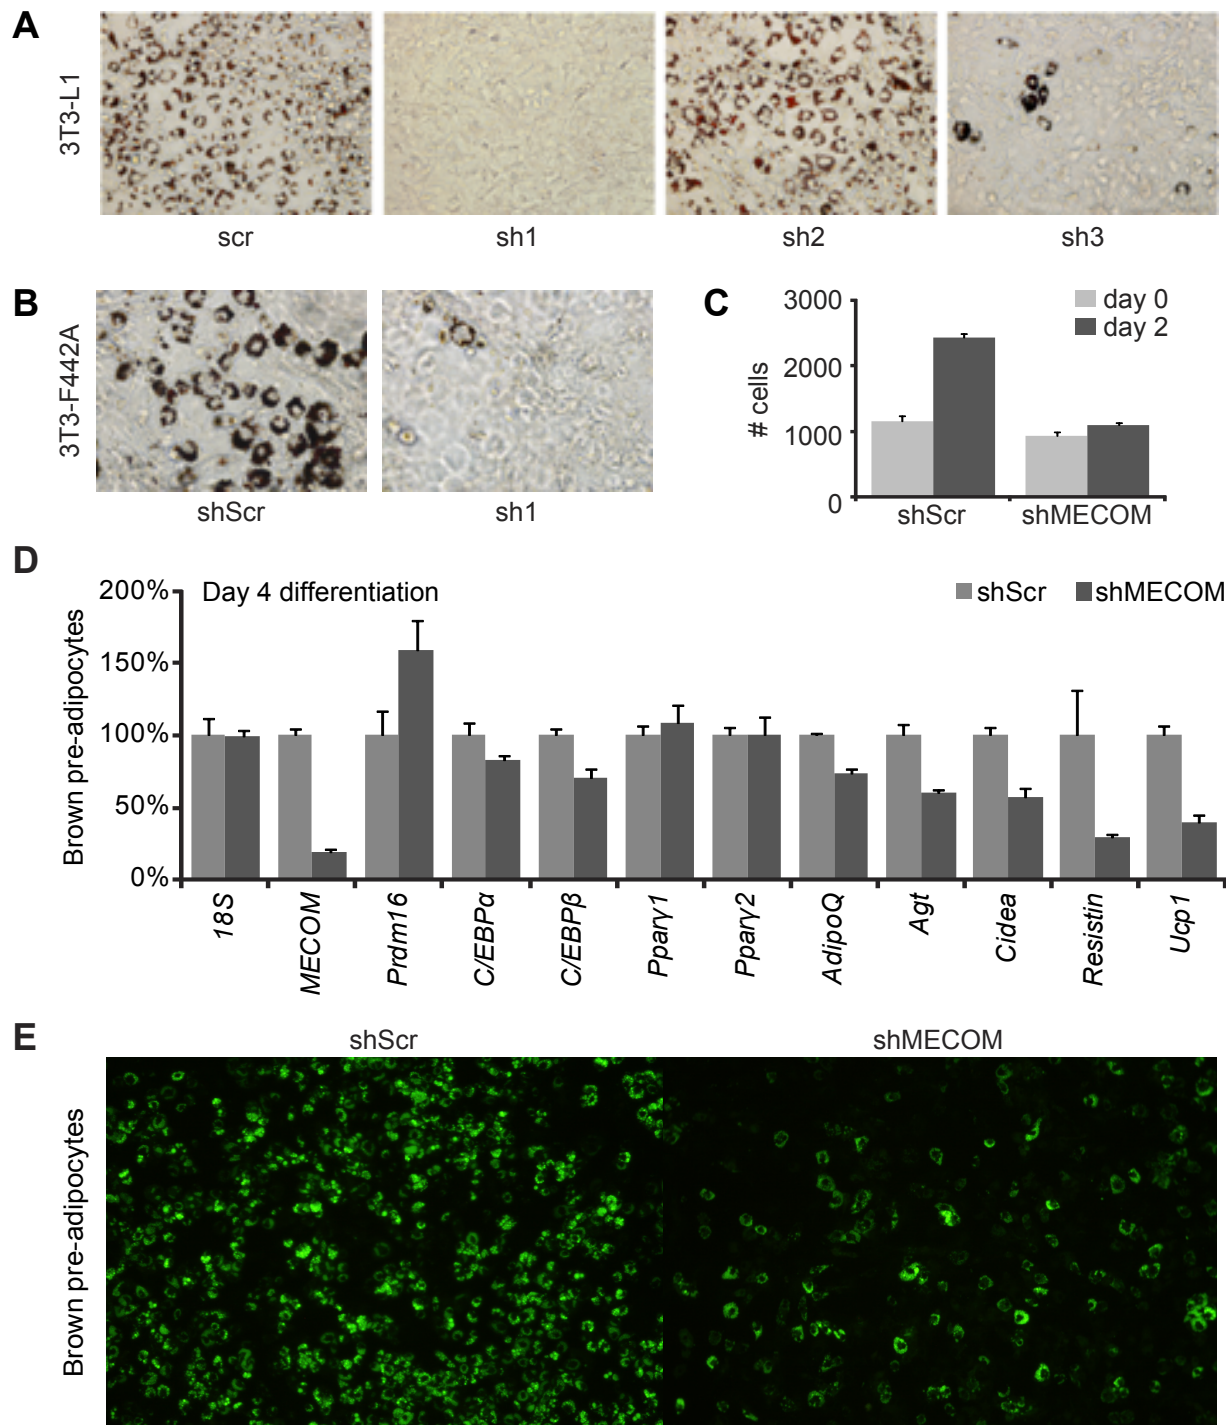

**FIG. S3:** shRNA knockdown of *MECOM* in pre-adipocytes inhibits adipogenesis. (A-B) Oil Red O staining of differentiating 3T3-L1 (A) and F442A (B) adipocytes demonstrates that shMECOM inhibits adipogenesis. Control shRNA (scr; scramble) or one of three shRNAs against *MECOM* (sh1, sh2, sh3). (C) Proliferation of 3T3-L1 cells after induction with differentiation medium. (D-E) Primary brown pre-adipocytes infected with shScr or shMECOM (sh1) and differentiated for 4 days. (D) Bodipy 493/503 staining for lipid accumulation. (E) RLT-PCR expression analysis.

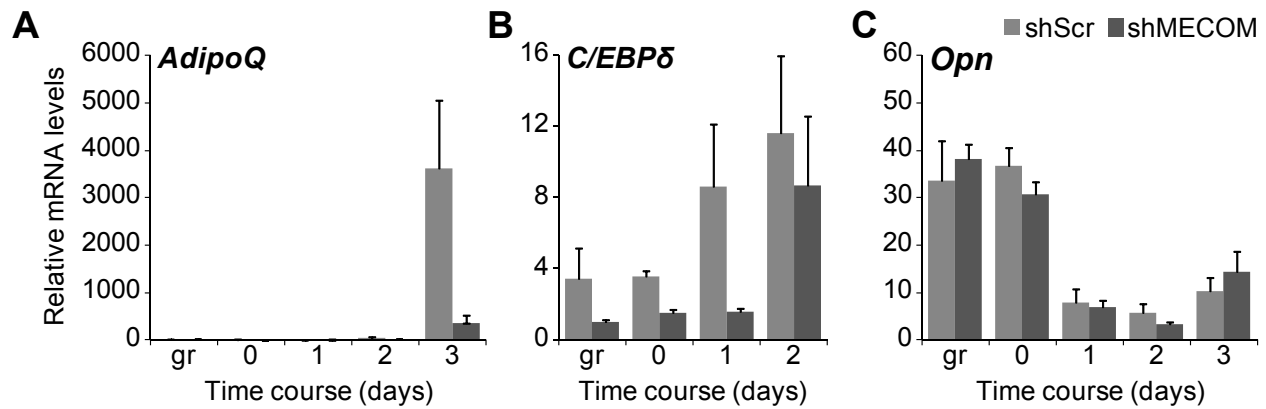

**FIG. S4:** shRNA knockdown of *MECOM* in 3T3-L1 cells inhibits adipogenesis but does not affect cell lineage determination. (A) Adipocyte differentiation marker *Adiponectin* (*AdipoQ*); (B) *C/EBPδ*; (C) osteogenesis marker *Osteopontin* (*Opn*); cartilage marker *collagen 2a* (*Col2a*) was undetected. Real-time PCR analysis of total RNA from 3T3-L1 infected with lentivirus expressing control (shScr) or *MECOM* (shMECOM) shRNAs. gr, sub-confluent growing conditions; 0 days, confluent cells at time of induction with differentiation medium; 1-3 days, time after addition of differentiation medium.

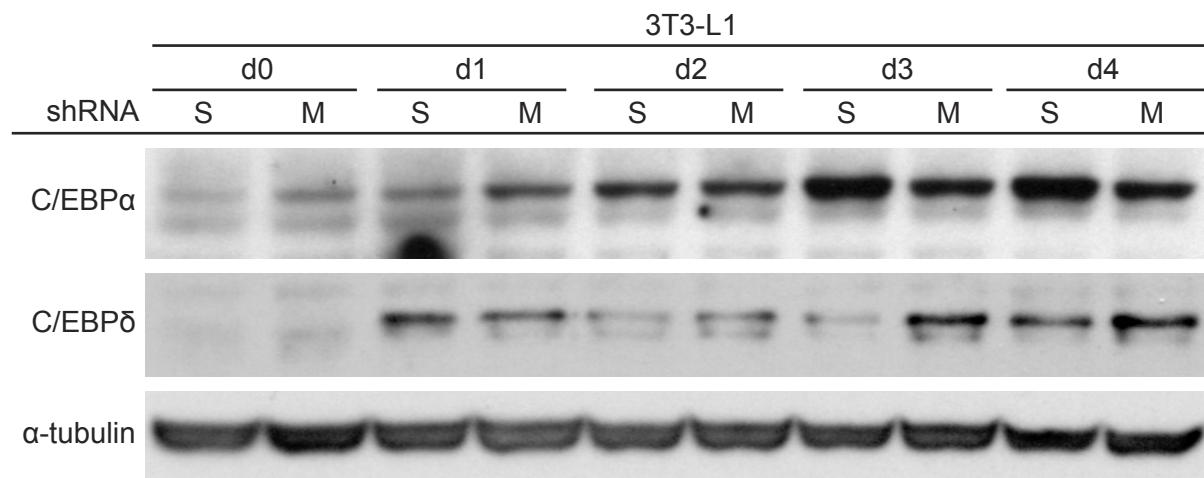

**FIG. S5:** Adipogenic transcription factor expression during differentiation in 3T3-L1 with shRNA knockdown of *MECOM*. Time points are prior to differentiation (d0) or days following induction (d1-d4), in cells infected with control (scramble, S) or *MECOM* (M) shRNAs.

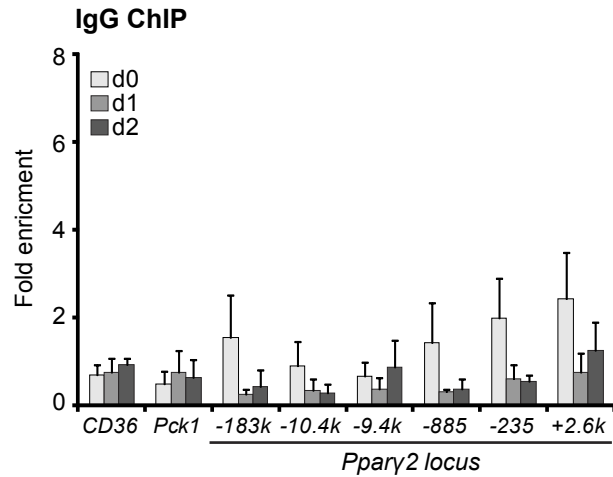

**FIG. S6:** Control IgG ChIP with does not enrich for C/EBP $\beta$  DNA binding sites at the *Ppar $\gamma$ 2*- promoter. 3T3-L1 cells were harvested for ChIP at day-0 (blue), day-1 (red), or day-2 (green) of adipocyte differentiation. Chromatin enrichment was analysed by real-time PCR as %input recovery at non-target (*CD36*; *Pck1*) and *Ppar $\gamma$ 2*-promoter sequences and normalized to *18S* %input to produce a fold-enrichment over background. *Ppar $\gamma$ 2* locus primers are denoted (eg. +2.6k) in base-pairs relative to the *Ppar $\gamma$ 2* transcriptional start site.

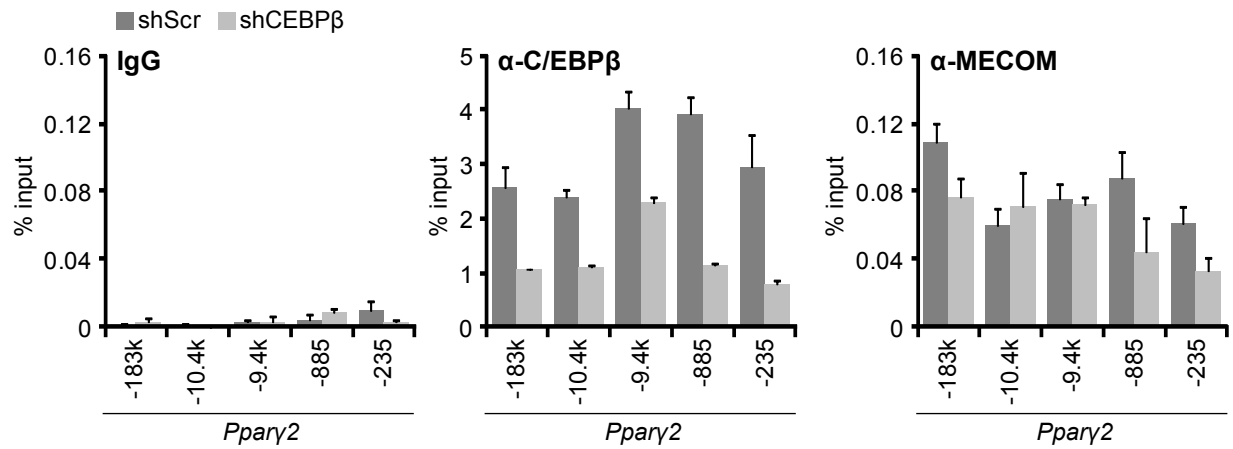

**FIG. S7:** Knockdown of C/EBPβ in 3T3-L1 reduces MECOM binding at *Ppary2*. 3T3-L1 cells infected with shC/EBPβ and differentiated for one day for ChIP analysis. Chromatin enrichment was analysed by real-time PCR as %input. *Ppary2* primers are denoted (eg. +2.6k) in base-pairs relative to the *Ppary2* transcriptional start site.

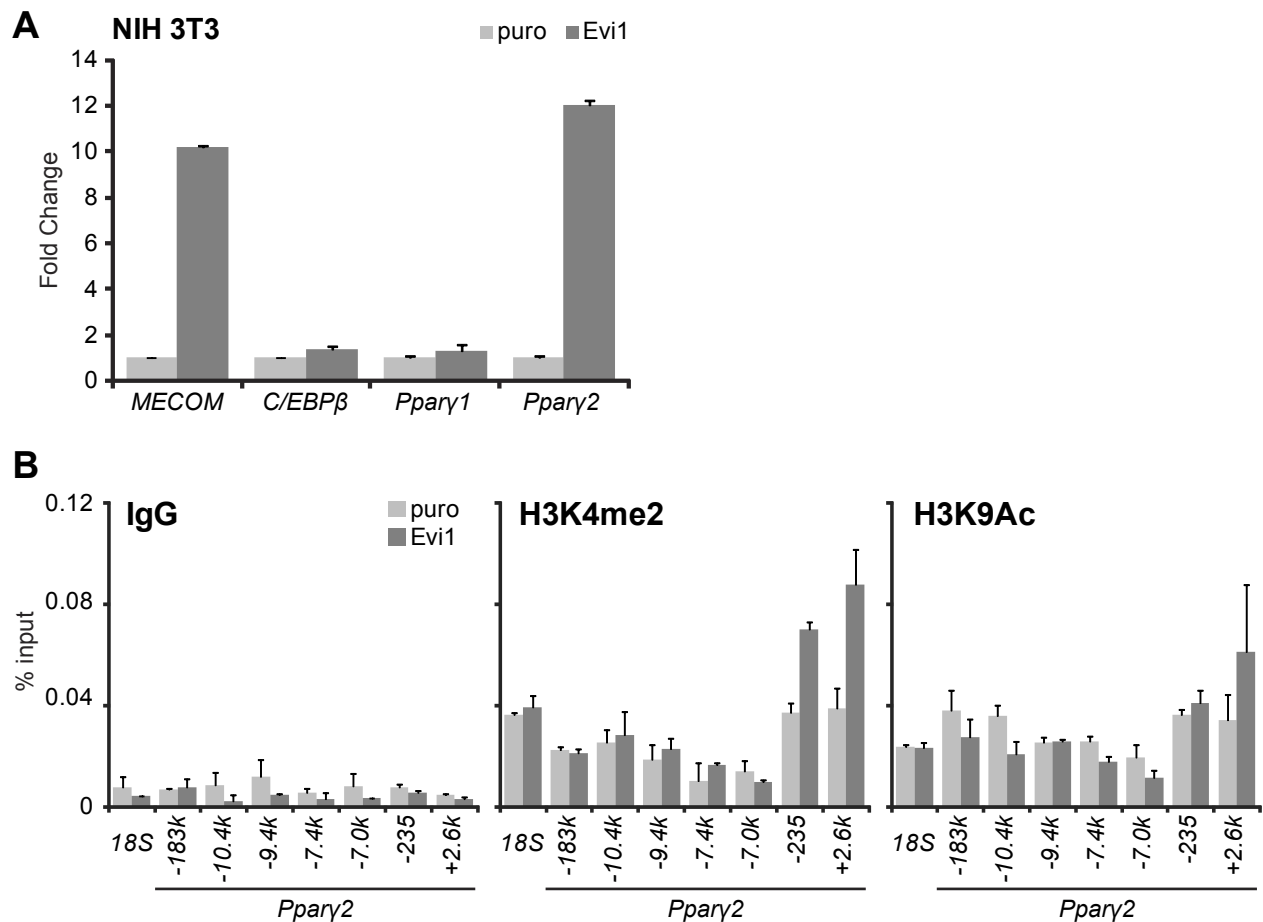

**FIG. S8:** Ectopic Evi1 expression in NIH 3T3 fibroblasts increases transcription-associated histone marks near the *Pparγ2* promoter. Evi1 was stably expressed in NIH 3T3 cells and grown to confluence (d0) prior to (A) expression analysis (normalized to *Tbp* and relative to puro) or (B) ChIP analysis for activating histone modifications. Chromatin enrichment was analysed by real-time PCR as %input recovery. *Pparγ2* locus primers are denoted (eg. +2.6k) in base-pairs relative to the *Pparγ2* transcriptional start site.



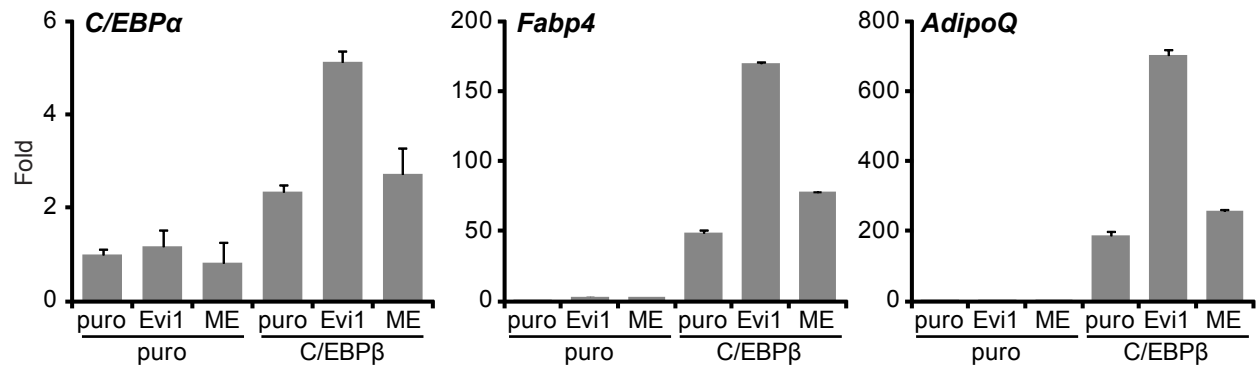

**FIG. S9:** Evi1 and C/EBPβ cooperate to convert NIH 3T3 cells into adipocytes. NIH 3T3 cells were stably infected with empty (puro), Evi1, or Mds1/Evi1 (ME) retrovirus, and re-infected with empty (puro) or C/EBPβ retrovirus. Gene expression was analysed at six days following addition of induction medium. Values normalized to *Tbp* expression and fold changes are expressed relative to the puro+puro controls.

**Table S10 - Real-time PCR primers**

| <b>Transcript</b>                  | <b>Forward</b> |                         | <b>Reverse</b> |                              |    |
|------------------------------------|----------------|-------------------------|----------------|------------------------------|----|
| <i>MECOM</i>                       | 5'             | atgcgtactttacagagatccg  | 3'             | 5' tcctgaagtgactgccattc      | 3' |
| <i>Evi1</i>                        | 5'             | attgctgagttgaggccgta    | 3'             | 5' gggccctcttcactcttcat      | 3' |
| <i>Mds1/Evi1</i>                   | 5'             | attccagctatggatgggaga   | 3'             | 5' ccagcttctacatctgggtg      | 3' |
| <i>AdipoQ</i>                      | 5'             | gcactggcaagttctactgcaa  | 3'             | 5' gtaggtgaagagaacggcctgt    | 3' |
| <i>C/EBP<math>\alpha</math></i>    | 5'             | tgcgcaagagccgagataa     | 3'             | 5' cggcattgtcactgggcaact     | 3' |
| <i>C/EBP<math>\beta</math></i>     | 5'             | acgacttctctccgacctct    | 3'             | 5' cgaggctcacgtaaccgtagt     | 3' |
| <i>Col2a</i>                       | 5'             | tcctctgcatgacattatctg   | 3'             | 5' ttctctttctgccctttg        | 3' |
| <i>Fabp4</i>                       | 5'             | acaccgagatttccttcaaactg | 3'             | 5' ccatctagggttatgatgctcttca | 3' |
| <i>Glut4</i>                       | 5'             | gtgactggaacactggctcta   | 3'             | 5' ccagccagttgcattgtag       | 3' |
| <i>Lipe</i>                        | 5'             | gaacccttcatgtctctct     | 3'             | 5' tgggagcaagaggcttttag      | 3' |
| <i>Opn</i>                         | 5'             | gtgattgctttgcctgtttg    | 3'             | 5' gagattctgcttctgagatggg    | 3' |
| <i>Ppar<math>\gamma</math></i>     | 5'             | gtgccagttcgatccgtaga    | 3'             | 5' ggccagcatcgtgtagatga      | 3' |
| <i>Ppar<math>\gamma</math>1(1)</i> | 5'             | tgaaagaagcgggaaccactg   | 3'             | 5' tggcatctctgtgtcaaccatg    | 3' |
| <i>Ppar<math>\gamma</math>1(2)</i> | 5'             | tgtgagaccaacagcctgac    | 3'             | 5' atatcagtggtcaccgcttc      | 3' |
| <i>Ppar<math>\gamma</math>2</i>    | 5'             | tggcatctctgtgtcaaccatg  | 3'             | 5' gcatgggcttctgctga         | 3' |
| <i>Resistin</i>                    | 5'             | tttcttctgtccctgaactg    | 3'             | 5' gatcttctgtcgatggcttcat    | 3' |
| <i>Tbp</i>                         | 5'             | gaagctgcggtacaattccag   | 3'             | 5' cccctgtacccttccaat        | 3' |

**Table S11 - CHIP PCR primers**

| <b>Locus</b>        |    | <b>Forward</b>         |    | <b>Reverse</b> |                       |    |
|---------------------|----|------------------------|----|----------------|-----------------------|----|
| <i>18S</i>          | 5' | agtccctgcccttgtacaca   | 3' | 5'             | cgatccgagggcctcact    | 3' |
| <i>CD36-PPRE</i>    | 5' | ccaacggaactgattgagc    | 3' | 5'             | ttgctgctacactccagcat  | 3' |
| <i>Pck1-PPRE</i>    | 5' | gaactccgacaagcaagctc   | 3' | 5'             | tggcactgagcaacaagac   | 3' |
| <i>Pparg2-183k</i>  | 5' | ctaggagcttctgctggctaga | 3' | 5'             | tgccaaactcccaatgttat  | 3' |
| <i>Pparg2-10.4k</i> | 5' | attgtttctccagctgccta   | 3' | 5'             | ttgaaatgagaagtgggaagg | 3' |
| <i>Pparg2-9.4k</i>  | 5' | tctcccagtaggaactgcat   | 3' | 5'             | ccttcacatctcttctccaaa | 3' |
| <i>Pparg2-1.2k</i>  | 5' | attgccaacttctcgattcac  | 3' | 5'             | tgatacccccaaatggaataa | 3' |
| <i>Pparg2-885</i>   | 5' | acttatgtgacaagggtgct   | 3' | 5'             | gcaaggaattgtggcagttt  | 3' |
| <i>Pparg2-235</i>   | 5' | gaacagtgaatgtgtgggtca  | 3' | 5'             | ctgactgagagccagttgtga | 3' |
| <i>Pparg2+2.6k</i>  | 5' | ctcaatatgcctcctcctctg  | 3' | 5'             | gctctattgcagcattgtca  | 3' |
